# Supplementary material
Source: PubMed Central journal article supplement (PMC7878423)
Supplement: NIHMS1656870-supplement-Online_Supplement.pdf [file NIHMS1656870-supplement-Online_Supplement.pdf]

## DATA SUPPLEMENT

### Association of Blood Pressure Variability and Diuretics with Cardiovascular Events in Patients with CKD Stages 1-5

L. Parker Gregg, MD, MSCS; S. Susan Hedayati, MD, MHSc; Hui Yang, MS; Peter N. Van Buren, MD, MSCS; Subhash Banerjee, MD; Sankar Navaneethan, MD, MS, MPH; Salim S. Virani, MD, PhD; Wolfgang C. Winkelmayer, MD, MPH, ScD; Carlos A. Alvarez, PharmD, MSCS

#### Corresponding Author:

L. Parker Gregg, MD, MSCS

Michael E. DeBakey VA Medical Center

Selzman Institute for Kidney Health, Baylor College of Medicine

VA Health Services Research and Development Center for Innovations in Quality, Effectiveness and Safety

Tel: 713-794-8601

Email: [Lucile.gregg@bcm.edu](mailto:Lucile.gregg@bcm.edu)

Table S1. List of included anti-hypertensive medications by class

Table S2. Propensity score model variable definitions

Table S3. Outcome variable definitions

Table S4. Definitions of proteinuria and albuminuria variables

Table S5. Baseline characteristics of the unmatched cohort

Table S6. Systolic coefficient of variation after second anti-hypertensive medication by subgroups

Table S7. Association of quintile of systolic blood pressure ARV and SD with time to CV event

Table S8. Association of quintile of systolic BPV prior to the index date and change in BPV with time to CV events

Table S9. Subgroup analyses of the association of the coefficient of variation of systolic blood pressure, taken continuously, with time to CV events

Figure S1. BPV before and after the index date by diuretic treatment group

**Table S1. List of included anti-hypertensive medications by class**

Diuretics:

- Loop Diuretics
  - Bumetanide
  - Furosemide
  - Torsemide
- Thiazide Diuretics
  - Chlorothiazide
  - Chlorthalidone
  - Hydrochlorothiazide
  - Indapamide
  - Metolazone

Non-Diuretics:

- Angiotensin Converting Enzyme Inhibitors
  - Benazepril
  - Captopril
  - Enalapril
  - Fosinopril
  - Lisinopril
  - Moexipril
  - Perindopril
  - Quinapril
  - Ramipril
  - Trandolapril
- Angiotensin Receptor Blockers
  - Azilsartan
  - Candesartan
  - Eprosartan
  - Irbesartan
  - Losartan
  - Olmesartan
  - Telmisartan
  - Valsartan

- Beta Blockers
  - Atenolol
  - Carvedilol
  - Esmolol
  - Labetalol
  - Metoprolol
  - Nadolol
  - Nebivolol
  - Propranolol
- Calcium channel blockers
  - Amlodipine
  - Diltiazem
  - Felodipine
  - Nicardipine
  - Verapamil
- Other
  - Aliskiren
  - Amiloride
  - Clonidine
  - Hydralazine
  - Minoxidil
  - Spironolactone

**Table S2. Propensity score model variable definitions**

| <b>Variable</b>                   | <b>Definition</b>                                                                                                                                                                                                                                                                 |
|-----------------------------------|-----------------------------------------------------------------------------------------------------------------------------------------------------------------------------------------------------------------------------------------------------------------------------------|
| <b>Demographics</b>               |                                                                                                                                                                                                                                                                                   |
| Age                               | Age in years at the index date                                                                                                                                                                                                                                                    |
| Sex                               | Male or female sex                                                                                                                                                                                                                                                                |
| Race                              | Self-identified race                                                                                                                                                                                                                                                              |
| <b>Baseline Laboratory Values</b> |                                                                                                                                                                                                                                                                                   |
| Estimated GFR                     | Calculated from baseline laboratory and demographic values using the CKD-EPI equation                                                                                                                                                                                             |
| Serum potassium                   | Most recent serum potassium measurement prior to the index date                                                                                                                                                                                                                   |
| Serum albumin                     | Most recent serum albumin measurement prior to the index date                                                                                                                                                                                                                     |
| Albuminuria or proteinuria        | Binary variable indicating one of the following baseline albuminuria measures: urine albumin/creatinine $\geq 30$ mg/g, urine protein/creatinine $\geq 0.15$ g/g, 24-hour urine albumin $> 30$ mg, 24-hour urine protein $> 150$ mg, dipstick urinalysis protein $\geq 30$ mg/dL. |
| <b>Comorbidities</b>              |                                                                                                                                                                                                                                                                                   |
|                                   | <b>Diagnosis code within 1 year prior to the index date</b>                                                                                                                                                                                                                       |
| Myocardial Infarction             | ICD-9-CM 410.x, 412.x<br>ICD-10 I21.x, I22.x, I25.2                                                                                                                                                                                                                               |
| Cerebrovascular Disease           | ICD-9-CM 430.x-438.x, 362.34<br>ICD-10 G45.x-46.x, H34.0, I60.x-69.x                                                                                                                                                                                                              |
| Congestive Heart Failure          | ICD-9-CM 428.x, 398.91, 402.01, 402.11, 402.91, 404.01, 404.03, 404.11, 404.13, 404.91, 404.93, 425.4-9, 428.x<br>ICD-10 I09.9, I11.0, I13.0, I13.2, I25.5, I42.0, I42.5-9, I43.x, I50.x, P29.0                                                                                   |
| Peripheral Vascular Disease       | ICD-9-CM 093.0, 437.3, 440.x, 441.x, 443.1-9, 447.1, 557.1, 557.9, 785.4, V43.4, Procedure 38.48<br>ICD-10 I70.x, I71.x, I73.x1, I73.8-9, I77.1, I79.0, I79.2, K55.1, K55.8-9, Z95.8-9                                                                                            |
| Liver Disease                     | ICD-9-CM 456.0-21, 571.2, 571.4-6, 572.2-8, 070.22-23, 070.32-33, 070.44, 070.54, 070.6, 070.9, 570.x, 571.x, 573.3-4, 573.8-9, V42.7<br>ICD-10 B18.x, I85.0, I85.9, I86.4, I98.2, K70.0-4, K70.9, K 71.1, K71.3-5, K71.7, K72.9, K73.x, K74.x, K76.0, K76.2-9, Z94.4             |
| Diabetes Mellitus                 | ICD-9-CM 250.0-9<br>ICD-10 E10.0-9, E11.0-9, E12.0-9, E13.0-9, E14.0-9                                                                                                                                                                                                            |
| Chronic pulmonary disease         | ICD-9-CM 416.8-9, 490.x-505.x, 506.4, 508.1, 508.8<br>ICD-10 I27.8-9, J40.x-47.x, J60.x-67.x, J68.4, J70.1, J70.3                                                                                                                                                                 |
| Human Immunodeficiency Virus      | ICD-9-CM 042.x-044.x<br>ICD-10 B20.x-22.x, B24.x                                                                                                                                                                                                                                  |
| Malignancy                        | ICD-9-CM 140.x-172.x, 174.x-195.8, 196.x-208.x, 238.6<br>ICD-10 C00.x-26.x, C30.x-34.x, C37.x-41.x, C43.x, C45.x, C58.x, C60.x-85.x, C88.x, C90.x-97.x                                                                                                                            |
| Hemiplegia or Paraplegia          | ICD-9-CM 344.1, 342.x-343.x, 344.0-6, 344.9; ICD-10 G04.1, G11.4, G80.1-2, G81.x-82.x, G83.0-4, G83.9                                                                                                                                                                             |
| Dementia                          | ICD-9-CM 290.x, 294.1, 331.2; ICD-10 F00.x-03.x, F05.1, G30.x-31.1                                                                                                                                                                                                                |
| Rheumatic Disease                 | ICD-9-CM 710.0-1, 710.4, 714.0-2, 714.81, 725.x; ICD-10 M05.x-06.x, M31.5, M32.x-34.x, M35.1, M35.3, M36.0                                                                                                                                                                        |
| Peptic Ulcer Disease              | ICD-9-CM 531.x-534.x; ICD-10 K25.x-28.x                                                                                                                                                                                                                                           |

|                                         |                                                                                                                                                                                                  |
|-----------------------------------------|--------------------------------------------------------------------------------------------------------------------------------------------------------------------------------------------------|
| Smoking                                 | ICD-9 codes 305.1 and V15.82<br>Smoking cessation clinic use, and/or<br>Use of medications for the treatment of nicotine dependence such as Zybanbupropion, nicotine replacement, or varenicline |
| <b>Medications</b>                      |                                                                                                                                                                                                  |
| Angiotensin converting enzyme inhibitor | Outpatient prescription for benazepril, captopril, enalapril, fosinopril, lisinopril, moexipril, perindopril, quinapril, ramipril, or trandolapril within 12 months prior to the index date      |
| Angiotensin receptor blocker            | Outpatient prescription for azilsartan, candesartan, eprosartan, irbesartan, losartan, olmesartan, telmisartan, or valsartan within 12 months prior to the index date                            |
| Calcium channel blocker                 | Outpatient prescription for amlodipine, diltiazem, felodipine, nicardipine, or verapamil within 12 months prior to the index date                                                                |
| Beta blocker                            | Outpatient prescription for atenolol, carvedilol, esmolol, labetalol, metoprolol, nadolol, nebivolol, or propranolol within 12 months prior to the index date                                    |
| Clonidine                               | Outpatient prescription within 12 months prior to the index date                                                                                                                                 |
| Hydralazine                             | Outpatient prescription within 12 months prior to the index date                                                                                                                                 |
| Minoxidil                               | Outpatient prescription within 12 months prior to the index date                                                                                                                                 |
| Spirolactone                            | Outpatient prescription within 12 months prior to the index date                                                                                                                                 |
| Aliskiren                               | Outpatient prescription within 12 months prior to the index date                                                                                                                                 |
| Amiloride                               | Outpatient prescription within 12 months prior to the index date                                                                                                                                 |
| Nitrates                                | Outpatient prescription within 12 months prior to the index date                                                                                                                                 |
| Statins                                 | Outpatient prescription for atorvastatin, fluvastatin, lovastatin, pravastatin, rosuvastatin, or simvastatin within 12 months prior to the index date                                            |
| Aspirin                                 | Outpatient prescription or listed on non-VA medications table within 12 months prior to the index date                                                                                           |
| <b>Other Characteristics</b>            |                                                                                                                                                                                                  |
| Body Mass Index                         | Calculated from baseline weight and height                                                                                                                                                       |
| Systolic and Diastolic Blood Pressures  | Most recent systolic and diastolic blood pressure readings prior to the index date                                                                                                               |
| Number of Outpatient Health Contacts    | Total number of primary care or specialist outpatient stop codes in 1 year prior to the index date                                                                                               |
| Total Number of Specialists             | Number of different medical or surgical sub-specialist stop codes in 1 year prior to the index date                                                                                              |

Abbreviations: GFR, glomerular filtration rate; ICD-9-CM, International Classification of Disease, Ninth Revision, Clinical Modification; ICD-10, International Classification of Disease, Tenth Revision

**Table S3. Outcome variable definitions**

| <b>Variable</b>                   | <b>Definition</b>                                                                                                                                                                                                                                | <b>Data Source</b>                        |
|-----------------------------------|--------------------------------------------------------------------------------------------------------------------------------------------------------------------------------------------------------------------------------------------------|-------------------------------------------|
| All-Cause Death                   | Death indicator in the CDW data (derived from the National Death Index, CMS, and VA data)                                                                                                                                                        | Outpatient data                           |
| CV Death                          | Death within 31 days of a CV Event (myocardial infarction, hospitalization for heart failure, or ischemic stroke)                                                                                                                                | Outpatient data, inpatient discharge data |
| Myocardial Infarction             | ICD-9 discharge diagnosis codes 410.00, 410.001, 410.10, 410.11, 410.20, 410.21, 410.30, 410.31, 410.40, 410.41, 410.50, 410.51, 410.60, 410.61, 410.70, 410.71, 410.80, 410.81, 410.90, 410.91<br>ICD-10 discharge diagnosis codes I21.x, I22.x | Outpatient data, inpatient discharge data |
| Hospitalization for Heart Failure | ICD-9 discharge diagnosis codes 402.01, 402.11, 402.91, 404.01, 404.03, 404.11, 404.13, 404.91, 404.93, 425.x, 428.x<br>ICD-10 discharge diagnosis codes I09.9, I11.0, I13.0, I13.2, I25.5, I42.0, I42.5-I42.9, I43.x, I50.x, P29.0              | Inpatient discharge data                  |
| Ischemic Stroke                   | ICD-9 discharge diagnosis codes 430, 431, 432.9, 433.01, 433.11, 433.81, 433.91, 434.01, 434.11, 434.91, 436<br>ICD-10 discharge diagnosis codes I61.x, I62.x, I63.x                                                                             | Outpatient data, inpatient discharge data |
| ESKD                              | Identified fromUSRDS data                                                                                                                                                                                                                        | USRDS                                     |

Abbreviations: CDW, Corporate Data Warehouse; CMS, Centers for Medicare and Medicaid Services; CPT, Current Procedural Terminology; CV, cardiovascular; ESKD, end-stage kidney disease; ICD-9-CM, International Classification of Disease, Ninth Revision, Clinical Modification; ICD-10, International Classification of Disease, Tenth Revision; USRDS, United States Renal Data System; VA, Veterans Affairs

**Table S4. Survival analysis covariate definitions (where different from propensity model definitions)**

| <b>Variable</b> | <b>Definition</b>                                                                                                                                                                                                                                                                                  |
|-----------------|----------------------------------------------------------------------------------------------------------------------------------------------------------------------------------------------------------------------------------------------------------------------------------------------------|
| Albuminuria     | LOINC codes 13705-9, 14958-3, 14959-1, 9318-7, 30000-4, 14585-3, 32294-1, 34535-5, 6941-9, 14956-7, 1755-8<br>LOINC codes 14957-5, 21059-1, 6942-7, 1754-1, or 30003-8 divided by LOINC codes 35207-7, 20624-3, 2161-8, or 35674-1 if these were measured on a sample with the same date and time. |
| Proteinuria     | LOINC codes 13801-6, 34366-5, 2890-2, 2889-4<br>LOINC codes 27298-9, 2888-6, 35663-4, 21482-5, or 50561-0 divided by LOINC codes 35207-7, 20624-3, 2161-8, or 35674-1 if these were measured on a sample with the same date and time.                                                              |

Albuminuria and proteinuria taken continuously were divided into deciles with an 11<sup>th</sup> category created for missing values. This allowed for inclusion of missing values, which were not missing at random, without imputing numbers for missing data. This also removed any outlier effect from some participants with extreme albuminuria or proteinuria, who were classified in the 10<sup>th</sup> decile.

**Table S5. Baseline characteristics of the unmatched cohort**

| <b>Variable</b>                     | <b>Non-Diuretic Exposed<br/>N=263,662</b> | <b>Diuretic Exposed<br/>N=68,739</b> | <b>Standardized Difference</b> |
|-------------------------------------|-------------------------------------------|--------------------------------------|--------------------------------|
| Age, years, mean (SD)               | 72.6 (10.6)                               | 73.4 (11.2)                          | 0.08                           |
| Female Sex, N (%)                   | 8,200 (3.1)                               | 2,641 (3.8)                          | 0.04                           |
| Race, N (%)                         |                                           |                                      | 0.01                           |
| White                               | 204,865 (77.7)                            | 52,186 (75.9)                        |                                |
| Black                               | 32,421 (12.3)                             | 9,656 (14.1)                         |                                |
| Native Hawaiian or Pacific Islander | 2,592 (1.0)                               | 655 (0.9)                            |                                |
| American Indian or Alaska Native    | 1,611 (0.6)                               | 419 (0.6)                            |                                |
| Asian                               | 1,594 (0.6)                               | 322 (0.5)                            |                                |
| Multi-race                          | 7 (0.0)                                   | 1 (0.0)                              |                                |
| Unknown                             | 20,572 (7.8)                              | 5,500 (8.0)                          |                                |
| Comorbidities*, N (%)               |                                           |                                      |                                |
| COPD                                | 49,517 (18.8)                             | 15,001 (21.8)                        | 0.08                           |
| Diabetes mellitus                   | 128,768 (48.8)                            | 31,934 (46.5)                        | 0.05                           |
| HIV                                 | 1,523 (0.6)                               | 341 (0.5)                            | 0.01                           |
| Peripheral vascular disease         | 31,519 (12.0)                             | 7,464 (10.9)                         | 0.03                           |
| Liver disease                       | 4,380 (1.7)                               | 1,540 (2.2)                          | 0.04                           |
| Malignancy                          | 40,794 (15.5)                             | 10,448 (15.2)                        | 0.008                          |
| Vascular disease                    | 56,397 (21.4)                             | 13,229 (19.3)                        | 0.05                           |
| Hemiplegia or paraplegia            | 1,082 (0.4)                               | 250 (0.4)                            | 0.008                          |
| Myocardial infarction               | 10,048 (3.8)                              | 1,896 (2.8)                          | 0.06                           |
| Congestive heart failure            | 23,404 (8.9)                              | 10,222 (14.9)                        | 0.19                           |
| Dementia                            | 4,113 (1.6)                               | 1,024 (1.5)                          | 0.006                          |
| Rheumatic disease                   | 4,526 (1.7)                               | 1,216 (1.8)                          | 0.004                          |
| Peptic ulcer disease                | 3,211 (1.2)                               | 797 (1.2)                            | 0.005                          |
| Smoking, N (%)                      | 4,213 (1.6)                               | 1,140 (1.7)                          | 0.005                          |
| Medications†, N (%)                 |                                           |                                      |                                |
| Nitrates                            | 29,878 (11.3)                             | 6,622 (9.6)                          | 0.06                           |
| Statins                             | 130,378 (49.5)                            | 31,654 (46.1)                        | 0.07                           |
| Aspirin                             | 46,923 (17.8)                             | 11,885 (17.3)                        | 0.01                           |
| ACE inhibitors                      | 154,953 (58.8)                            | 30,827 (44.9)                        | 0.28                           |
| ARBs                                | 50,842 (19.3)                             | 8,749 (12.7)                         | 0.18                           |
| Beta blockers                       | 176,209 (66.8)                            | 30,442 (44.3)                        | 0.47                           |
| Calcium channel blockers            | 126,443 (48.0)                            | 18,087 (26.3)                        | 0.46                           |
| Spironolactone                      | 11,216 (4.3)                              | 2,566 (3.7)                          | 0.03                           |
| Hydralazine                         | 9,860 (3.7)                               | 1,386 (2.0)                          | 0.10                           |
| Clonidine                           | 9,454 (3.6)                               | 1,037 (1.5)                          | 0.13                           |
| Minoxidil                           | 671 (0.3)                                 | 112 (0.2)                            | 0.02                           |
| Aliskiren                           | 40 (0.0)                                  | 1 (0.0)                              | 0.02                           |
| Amiloride                           | 268 (0.1)                                 | 22 (0.0)                             | 0.03                           |
| Laboratory and clinical variables   |                                           |                                      |                                |

|                                                                    |                   |                   |       |
|--------------------------------------------------------------------|-------------------|-------------------|-------|
| Estimated GFR, mL/min/1.73 m <sup>2</sup> , median (IQR)           | 51.4 (42.7, 57.6) | 50.9 (41.5, 58.1) | 0.007 |
| Albuminuria, mg/g, median (IQR)                                    | 30.9 (9.7, 106.9) | 30.7 (9.7, 114.3) | 0.004 |
| Proteinuria, g/g, median (IQR)                                     | 0.2 (0.1, 0.7)    | 0.3 (0.1, 0.8)    | 0.004 |
| Serum potassium, mmol/L, mean (SD)                                 | 4.4 (0.5)         | 4.4 (0.5)         | 0.12  |
| Serum albumin, g/dL, mean (SD)                                     | 3.9 (0.4)         | 3.9 (0.5)         | 0.13  |
| Systolic blood pressure, mmHg, mean (SD)                           | 137.3 (21.6)      | 137.9 (22.3)      | 0.03  |
| Diastolic blood pressure, mmHg, mean (SD)                          | 74.9 (13.0)       | 75.2 (13.6)       | 0.02  |
| Body mass index, kg/m <sup>2</sup> , mean (SD)                     | 29.7 (5.8)        | 30.5 (6.4)        | 0.13  |
| Number of visits in 1 year prior to the index date, mean (SD)      | 11.3 (10.6)       | 11.3 (10.7)       | 0.001 |
| Number of specialists in 1 year prior to the index date, mean (SD) | 1.9 (2.0)         | 1.9 (2.0)         | 0.04  |

Abbreviations: ACE inhibitors, angiotensin converting enzyme inhibitors; ARBs, angiotensin receptor blockers; COPD, chronic obstructive pulmonary disease; GFR, glomerular filtration rate; HIV, human immunodeficiency virus

\*Defined by International Classification of Diseases codes

†Defined as exposure in pharmacy records within 1 year prior to the index date



**Table S6. Systolic coefficient of variation after second anti-hypertensive medication by subgroups**

| <b>Subgroup, mean (SD)</b>             | <b>Non-Diuretic Exposed<br/>N=31,394</b> | <b>Diuretic Exposed<br/>N=31,394</b> |
|----------------------------------------|------------------------------------------|--------------------------------------|
| All Participants                       | 10.9 (5.2)                               | 10.9 (5.3)                           |
| Age, years                             |                                          |                                      |
| <65                                    | 10.8 (4.8)                               | 11.0 (5.0)                           |
| ≥65                                    | 10.9 (5.4)                               | 10.8 (5.3)                           |
| Race                                   |                                          |                                      |
| White                                  | 10.8 (5.2)                               | 10.8 (5.2)                           |
| Black                                  | 11.2 (5.2)                               | 11.2 (5.3)                           |
| Native Hawaiian or Pacific Islander    | 11.1 (5.1)                               | 9.8 (4.8)                            |
| American Indian or Alaska Native       | 11.0 (5.0)                               | 11.2 (4.8)                           |
| Asian                                  | 9.8 (4.8)                                | 10.8 (5.0)                           |
| Unknown                                | 10.7 (5.6)                               | 10.8 (5.6)                           |
| CKD stage                              |                                          |                                      |
| Stage 1                                | 11.3 (5.1)                               | 11.3 (5.0)                           |
| Stage 2                                | 10.6 (4.9)                               | 10.9 (5.0)                           |
| Stage 3                                | 10.8 (5.3)                               | 10.8 (5.3)                           |
| Stage 4                                | 11.8 (5.5)                               | 11.5 (5.2)                           |
| Stage 5                                | 12.7 (5.4)                               | 12.5 (5.4)                           |
| No. BP measurements in BPV calculation |                                          |                                      |
| <4                                     | 9.3 (6.7)                                | 9.3 (6.6)                            |
| 4-6                                    | 10.7 (4.9)                               | 10.8 (5.1)                           |
| 7-9                                    | 11.4 (4.3)                               | 11.6 (4.4)                           |
| 10-12                                  | 11.9 (4.0)                               | 11.8 (3.9)                           |
| 13-15                                  | 12.3 (3.9)                               | 12.1 (3.7)                           |
| ≥16                                    | 12.4 (3.5)                               | 12.4 (3.5)                           |
| Concomitant medications                |                                          |                                      |
| ACE inhibitor                          | 11.0 (5.3)                               | 11.1 (5.4)                           |
| No ACE inhibitor                       | 10.7 (5.2)                               | 10.7 (5.1)                           |
| ARB                                    | 10.3 (5.1)                               | 10.9 (5.3)                           |
| No ARB                                 | 10.9 (5.2)                               | 10.9 (5.2)                           |
| Spironolactone                         | 10.7 (4.9)                               | 11.1 (5.1)                           |
| No spironolactone                      | 10.9 (5.2)                               | 10.9 (5.3)                           |
| Calcium channel blocker                | 10.5 (5.0)                               | 10.4 (5.1)                           |
| No calcium channel blocker             | 11.0 (5.3)                               | 11.1 (5.3)                           |
| Beta blockers                          | 11.1 (5.2)                               | 11.2 (5.4)                           |
| No beta blockers                       | 10.6 (5.2)                               | 10.5 (5.1)                           |
| Hydralazine                            | 11.6 (5.5)                               | 12.4 (5.8)                           |
| No hydralazine                         | 10.8 (5.2)                               | 10.8 (5.2)                           |
| Clonidine                              | 12.4 (5.6)                               | 12.4 (5.7)                           |

|                                                              |            |            |
|--------------------------------------------------------------|------------|------------|
| No clonidine                                                 | 10.8 (5.2) | 10.8 (5.2) |
| Comorbid medical conditions                                  |            |            |
| Congestive Heart Failure                                     | 11.4 (5.0) | 11.5 (5.1) |
| No congestive heart failure                                  | 10.8 (5.2) | 10.8 (5.3) |
| Liver disease                                                | 11.1 (4.8) | 11.3 (5.0) |
| No liver disease                                             | 10.8 (5.2) | 10.9 (5.3) |
| Diabetes mellitus                                            | 10.9 (5.1) | 11.0 (5.2) |
| No diabetes mellitus                                         | 10.8 (5.3) | 10.8 (5.3) |
| Vascular disease                                             | 11.7 (5.4) | 11.6 (5.3) |
| No vascular disease                                          | 10.6 (5.2) | 10.7 (5.2) |
| Malignancy                                                   | 11.3 (5.0) | 11.1 (4.9) |
| No malignancy                                                | 10.8 (5.3) | 10.8 (5.3) |
| Smoking                                                      | 12.0 (5.1) | 11.7 (4.9) |
| No smoking                                                   | 10.8 (5.2) | 10.9 (5.3) |
| Number of visits in 1 year prior to the index date           |            |            |
| 0-5                                                          | 9.9 (5.9)  | 10.3 (5.9) |
| 6-10                                                         | 10.6 (5.3) | 10.6 (5.4) |
| 11-15                                                        | 11.1 (5.0) | 11.0 (5.2) |
| 16-20                                                        | 11.4 (5.0) | 11.2 (4.9) |
| 21-25                                                        | 11.5 (4.7) | 11.4 (4.6) |
| ≥26                                                          | 11.6 (4.5) | 11.6 (4.4) |
| Number of specialists seen in 1 year prior to the index date |            |            |
| 0-2                                                          | 10.4 (5.5) | 10.6 (5.6) |
| 3-5                                                          | 11.4 (4.9) | 11.2 (4.8) |
| 6-8                                                          | 11.6 (4.5) | 11.6 (4.4) |
| ≥9                                                           | 11.8 (4.1) | 11.8 (3.8) |

Table S7. Association of quintile of systolic blood pressure average real variability and standard deviation with time to CV event

| Model                           | Main Effects<br>HR (95% CI)<br>N=62,788 | Non-Diuretic<br>Exposed<br>HR (95% CI)<br>N=31,394 | Diuretic<br>Exposed<br>HR (95% CI)<br>N=31,394 | Treatment<br>group x<br>BPV<br>interaction<br>P value |
|---------------------------------|-----------------------------------------|----------------------------------------------------|------------------------------------------------|-------------------------------------------------------|
| <b>Average Real Variability</b> |                                         |                                                    |                                                |                                                       |
| Q1                              | Ref                                     | Ref                                                | Ref                                            |                                                       |
| Q2                              | 1.58 (1.38, 1.80)                       | 1.59 (1.39, 1.82)                                  | 1.40 (1.25, 1.58)                              | 0.25                                                  |
| Q3                              | 1.76 (1.55, 2.01)                       | 1.78 (1.57, 2.03)                                  | 1.58 (1.41, 1.77)                              | 0.27                                                  |
| Q4                              | 2.00 (1.76, 2.27)                       | 2.01 (1.77, 2.29)                                  | 1.62 (1.44, 1.81)                              | 0.02                                                  |
| Q5                              | 2.05 (1.80, 2.34)                       | 2.05 (1.80, 2.34)                                  | 1.67 (1.48, 1.88)                              | 0.03                                                  |
| <b>Standard Deviation</b>       |                                         |                                                    |                                                |                                                       |
| Q1                              | Ref                                     | Ref                                                | Ref                                            |                                                       |
| Q2                              | 1.68 (1.45, 1.96)                       | 1.72 (1.48, 2.00)                                  | 1.57 (1.38, 1.79)                              | 0.59                                                  |
| Q3                              | 2.02 (1.75, 2.33)                       | 2.07 (1.79, 2.39)                                  | 1.82 (1.60, 2.06)                              | 0.39                                                  |
| Q4                              | 2.34 (2.03, 2.70)                       | 2.39 (2.08, 2.76)                                  | 1.92 (1.69, 2.18)                              | 0.07                                                  |
| Q5                              | 2.77 (2.40, 3.19)                       | 2.81 (2.44, 3.25)                                  | 2.35 (2.07, 2.66)                              | 0.11                                                  |

Adjusted for the total number of blood pressure measurements in the BPV calculation, the total number of clinic stops in 1 year prior to the index date, age, sex, race, eGFR, systolic blood pressure, BMI, albuminuria, proteinuria, smoking, diabetes mellitus, congestive heart failure, vascular disease, malignancy, and treatment in 1 year prior to the index date with an ACEi or ARB, spironolactone, a beta blocker, a calcium channel blocker, clonidine or hydralazine, or a statin

**Table S8. Association of quintile of systolic BPV prior to the index date and change in BPV with time to CV events**

| Model                                                                                           | Main Effects<br>HR (95% CI) | Non-Diuretic<br>Exposed<br>HR (95% CI) | Diuretic<br>Exposed<br>HR (95% CI) | Treatment<br>group x<br>BPV<br>interaction<br><i>P</i> value |
|-------------------------------------------------------------------------------------------------|-----------------------------|----------------------------------------|------------------------------------|--------------------------------------------------------------|
| <b>BPV for 6 months prior to the index date</b>                                                 |                             |                                        |                                    |                                                              |
| Q1                                                                                              | Ref                         | Ref                                    | Ref                                |                                                              |
| Q2                                                                                              | 1.23 (1.07, 1.41)           | 1.26 (1.10, 1.45)                      | 1.09 (0.97, 1.23)                  | 0.24                                                         |
| Q3                                                                                              | 1.39 (1.22, 1.58)           | 1.42 (1.25, 1.62)                      | 1.22 (1.09, 1.37)                  | 0.23                                                         |
| Q4                                                                                              | 1.43 (1.26, 1.63)           | 1.47 (1.29, 1.68)                      | 1.35 (1.21, 1.51)                  | 0.65                                                         |
| Q5                                                                                              | 1.64 (1.45, 1.86)           | 1.69 (1.49, 1.92)                      | 1.39 (1.25, 1.56)                  | 0.09                                                         |
| <b>Change in BPV from 6 months prior to the index date to 6 months following the index date</b> |                             |                                        |                                    |                                                              |
| Q1                                                                                              | Ref                         | Ref                                    | Ref                                |                                                              |
| Q2                                                                                              | 1.03 (0.91, 1.16)           | 1.04 (0.92, 1.18)                      | 1.18 (1.06, 1.32)                  | 0.06                                                         |
| Q3                                                                                              | 1.04 (0.92, 1.17)           | 1.07 (0.94, 1.20)                      | 1.08 (0.97, 1.21)                  | 0.53                                                         |
| Q4                                                                                              | 1.07 (0.95, 1.21)           | 1.08 (0.96, 1.22)                      | 1.12 (1.01, 1.26)                  | 0.45                                                         |
| Q5                                                                                              | 1.20 (1.07, 1.35)           | 1.20 (1.07, 1.35)                      | 1.23 (1.10, 1.37)                  | 0.71                                                         |

Adjusted for the total number of blood pressure measurements in the BPV calculation, the total number of clinic stops in 1 year prior to the index date, age, sex, race, eGFR, systolic blood pressure, BMI, albuminuria, proteinuria, smoking, diabetes mellitus, congestive heart failure, vascular disease, malignancy, and treatment in 1 year prior to the index date with an ACEi or ARB, spironolactone, a beta blocker, a calcium channel blocker, clonidine or hydralazine, or a statin

**Table S9. Subgroup analyses of the association of the coefficient of variation of systolic blood pressure, taken continuously, with time to CV events**

| <b>Model</b>     | <b>Main Effects<br/>aHR (95% CI)<br/>per increase<br/>of 1% in BPV</b> | <b>Non-Diuretic<br/>Exposed<br/>aHR (95% CI)</b> | <b>Diuretic<br/>Exposed<br/>aHR (95% CI)</b> | <b>Treatment<br/>group x BPV<br/>interaction <i>P</i><br/>value</b> |
|------------------|------------------------------------------------------------------------|--------------------------------------------------|----------------------------------------------|---------------------------------------------------------------------|
| CKD Stages 1-2   | 1.06 (1.05, 1.08)                                                      | 1.07 (1.05, 1.09)                                | 1.05 (1.03, 1.07)                            | 0.29                                                                |
| CKD Stages 3-5   | 1.05 (1.04, 1.06)                                                      | 1.05 (1.04, 1.06)                                | 1.05 (1.04, 1.05)                            | 0.54                                                                |
| Black            | 1.05 (1.04, 1.07)                                                      | 1.05 (1.04, 1.07)                                | 1.04 (1.02, 1.06)                            | 0.47                                                                |
| Not Black        | 1.05 (1.05, 1.06)                                                      | 1.06 (1.05, 1.06)                                | 1.05 (1.04, 1.06)                            | 0.44                                                                |
| Male             | 1.05 (1.05, 1.06)                                                      | 1.05 (1.05, 1.06)                                | 1.05 (1.04, 1.05)                            | 0.23                                                                |
| Female           | 1.06 (1.01, 1.10)                                                      | 1.05 (1.00, 1.10)                                | 1.09 (1.05, 1.14)                            | 0.18                                                                |
| Diabetes         | 1.06 (1.05, 1.07)                                                      | 1.06 (1.05, 1.07)                                | 1.05 (1.04, 1.06)                            | 0.33                                                                |
| No Diabetes      | 1.05 (1.04, 1.06)                                                      | 1.05 (1.04, 1.06)                                | 1.05 (1.04, 1.06)                            | 0.61                                                                |
| RAAS Blockade*   | 1.05 (1.04, 1.06)                                                      | 1.05 (1.04, 1.06)                                | 1.05 (1.04, 1.06)                            | 0.54                                                                |
| No RAAS Blockade | 1.06 (1.05, 1.07)                                                      | 1.06 (1.05, 1.07)                                | 1.05 (1.04, 1.06)                            | 0.05                                                                |
| Heart Failure    | 1.04 (1.03, 1.05)                                                      | 1.04 (1.03, 1.05)                                | 1.04 (1.03, 1.05)                            | 0.84                                                                |
| No Heart Failure | 1.06 (1.05, 1.07)                                                      | 1.06 (1.05, 1.07)                                | 1.05 (1.04, 1.07)                            | 0.31                                                                |

\*Defined as exposure to an ACEi or ARB in 1 year prior to the index date

Adjusted for the total number of blood pressure measurements in the BPV calculation, the total number of clinic stops in 1 year prior to the index date, age, sex, race, eGFR, systolic blood pressure, BMI, albuminuria, proteinuria, smoking, diabetes mellitus, congestive heart failure, vascular disease, malignancy, and treatment in 1 year prior to the index date with an ACEi or ARB, spironolactone, a beta blocker, a calcium channel blocker, clonidine or hydralazine, or a statin

Figure S1. BPV before and after the index date by diuretic treatment group

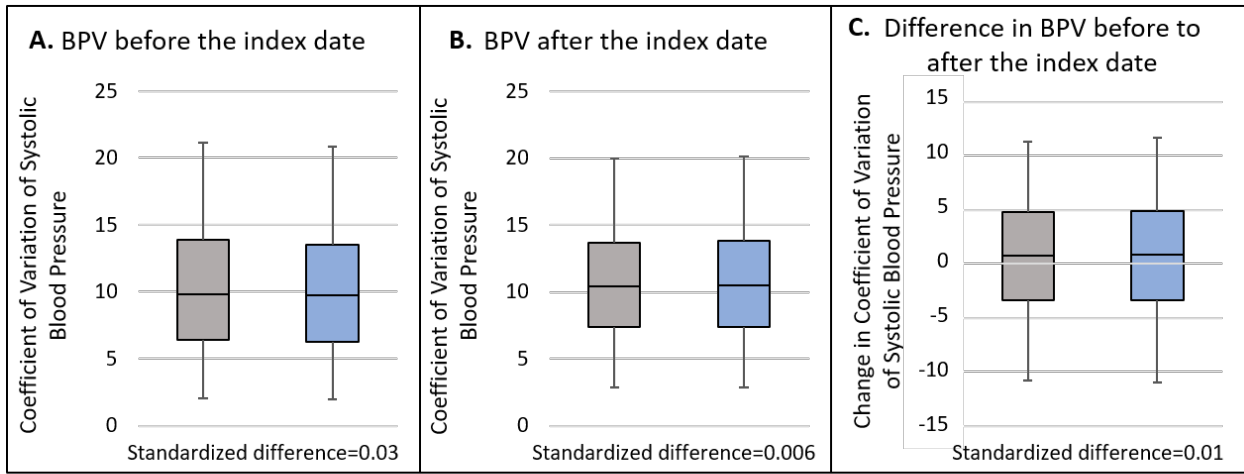

■ Non-diuretic exposed    ■ Diuretic exposed
